# Supplementary material for: Nucleoredoxin Knockdown in SH-SY5Y Cells Promotes Cell Renewal
Source: MDPI journal article supplement (doi:10.3390/antiox10030449), 2021-03-13

## Suppl. Table 1: Antibodies

| Antibody                                      | Seller         | Product #  | Dilution       | Host   | Type | Protocol        | Use      |
|-----------------------------------------------|----------------|------------|----------------|--------|------|-----------------|----------|
| <b>β-actin</b>                                | Sigma          | A5060      | 1:1000         | rabbit | pab  | 1 h, RT         | WB       |
| <b>Cytochrome oxidase COX-IV</b>              | Abcam          | ab333985   | 1:100          | mouse  | mab  | 1 d, 4°C        | IF       |
| <b>GAPDH</b>                                  | Ambion         | AM4300     | 1:1000         | mouse  | mab  | 1 d, 4°C        | WB       |
| <b>Hsc70/HSPA8</b>                            | Abcam          | ab19136    | 1:200          | rat    | mab  | 1 d, 4°C        | WB       |
| <b>Ki67</b>                                   | Abcam          | ab15580    | 1:500          | rabbit | pab  | 1 d, 4°C        | IF       |
| <b>LC3b</b>                                   | Cell Signaling | 2775S      | 1:300<br>1:200 | rabbit | pab  | 3 d, 4°C        | IF<br>WB |
| <b>Nucleoredoxin</b>                          | Sigma          | HPA023566  | 1:200          | rabbit | pab  | 1 d, 4°C        | IF, WB   |
| <b>SQSTM1/p62</b>                             | Abcam          | ab155686   | 1:200          | rabbit | pab  | 3 d, 4°C        | WB       |
| <b>Ubiquitin C (UBC)</b>                      | Cell Signaling | 3936       | 1:200          | mouse  | mab  | 3 d, 4°C        | WB       |
| <b>UBE2D2</b>                                 | Santa Cruz     | sc166278   | 1:200          | mouse  | mab  | 3 d, 4°C        | WB       |
| <b>Vimentin</b>                               | Abcam          | ab92547    | 1:100          | rabbit | mab  | 1 d, 4°C        | IF       |
| <b>Drp1</b>                                   | Cell Signal    | D6C7 #8570 | 1:200          | rabbit | mab  | 1 d, 4°C        | IF       |
| <b>Wheat germ agglutinin, AF488 conjugate</b> | Invitrogen     | W11261     | 5 µg/ml        |        |      | 10 min,<br>37°C | IF       |

WB, Western Blot; IF, immunofluorescence

## Suppl. Fig. 1

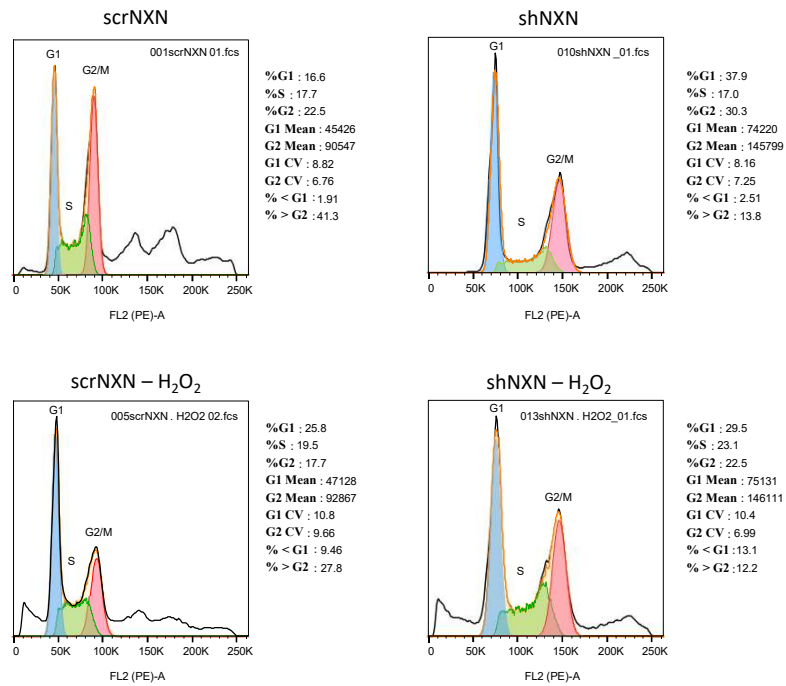

Suppl. Fig. 1: Cell cycle analysis of naive and H<sub>2</sub>O<sub>2</sub>-treated shNXN SH-SY5Y neuroblastoma cells versus scrambled control cells (scrNXN). The cell cycle distribution was fitted to an univariate algorithm similar to a Watson Pragmatic algorithm with FlowJo V10.6. The images show exemplary results for each group.

Suppl. Fig. 2: Bafilomycin 1  $\mu$ M (blots of Fig. 4)

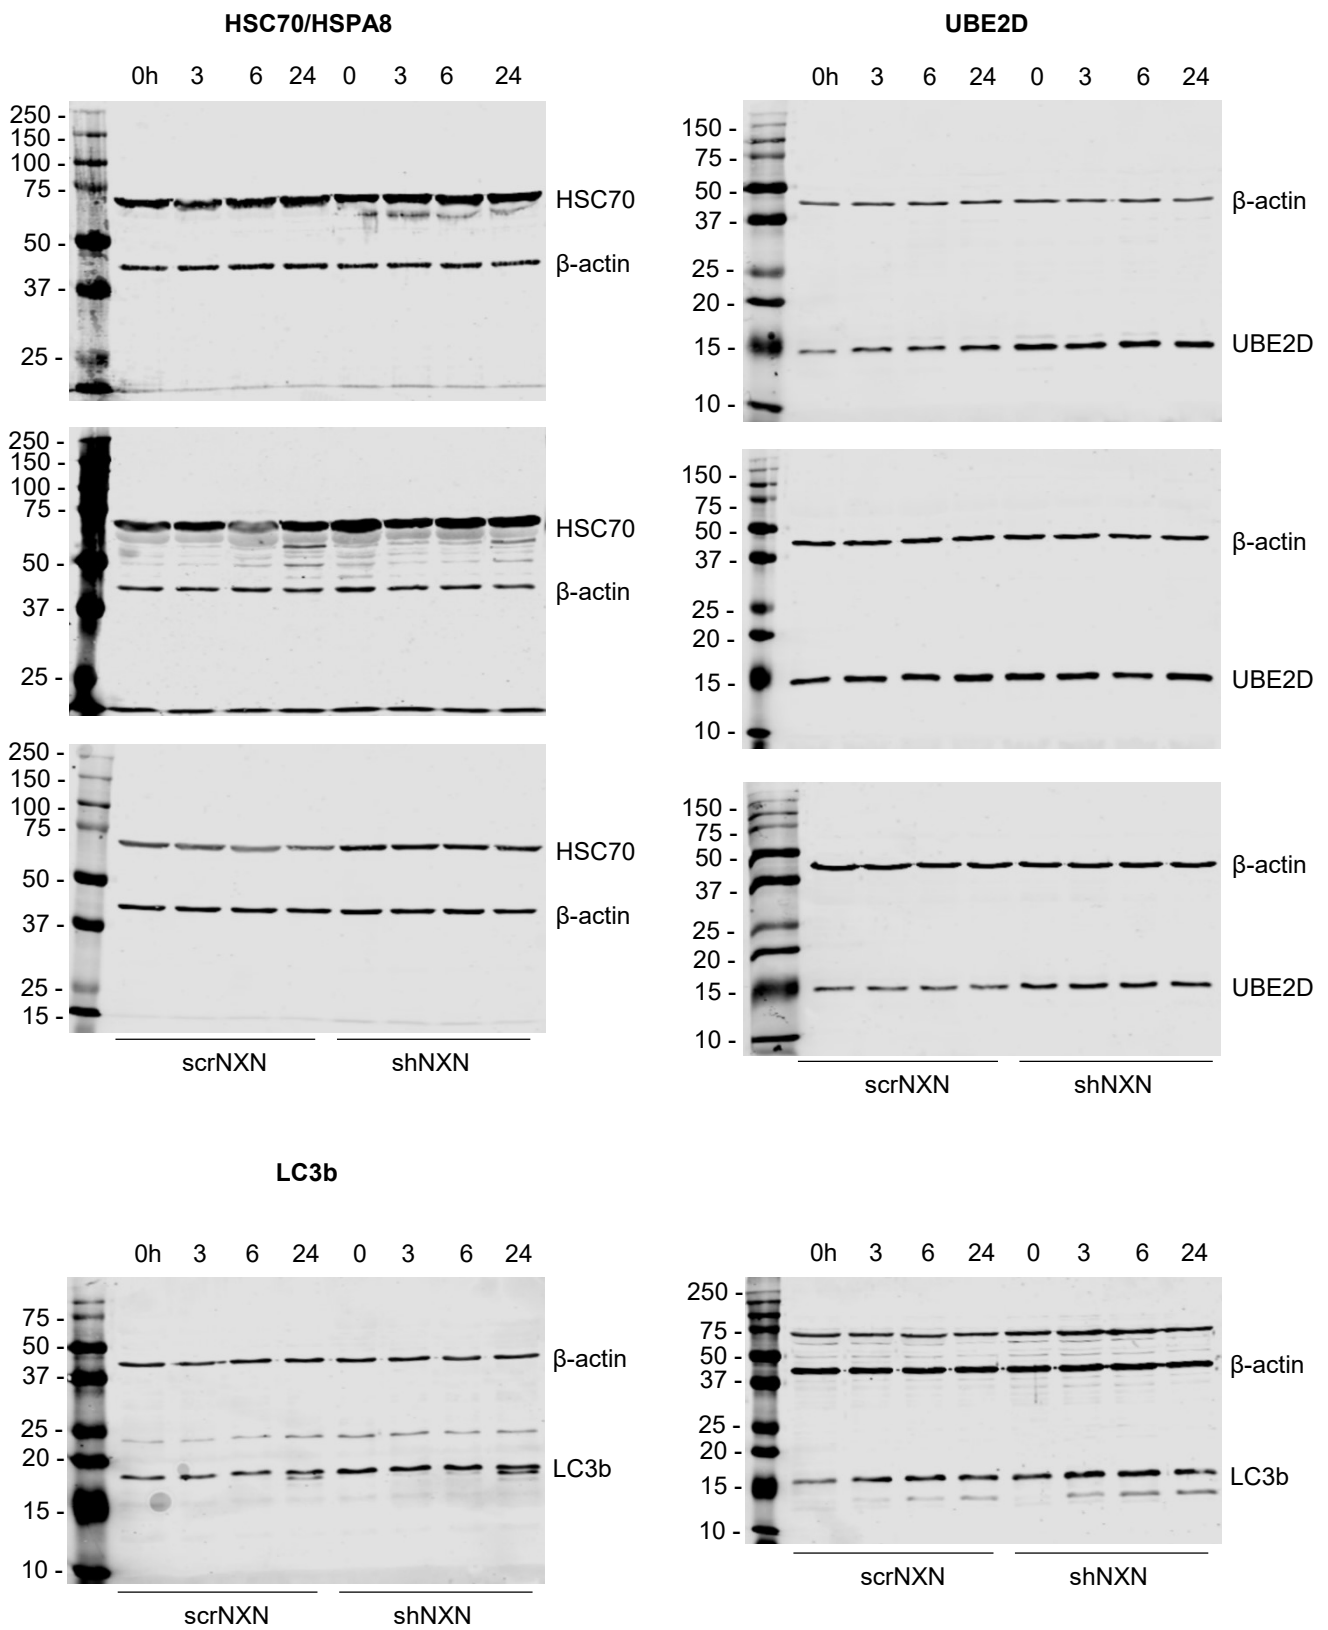

Suppl. Fig. 2: Uncut raw Western Blots presented in Figure 4. shNXN, shRNA against NXN, stably transduced SH-SY5Y neuroblastoma cells; scrNXN, scrambled shRNA transduced control SH-SY5Y cells. Blots were sequentially developed and analyzed using infrared technology

Suppl. Fig. 3 Bafilomycin 1  $\mu$ M (blots of Fig. 4)

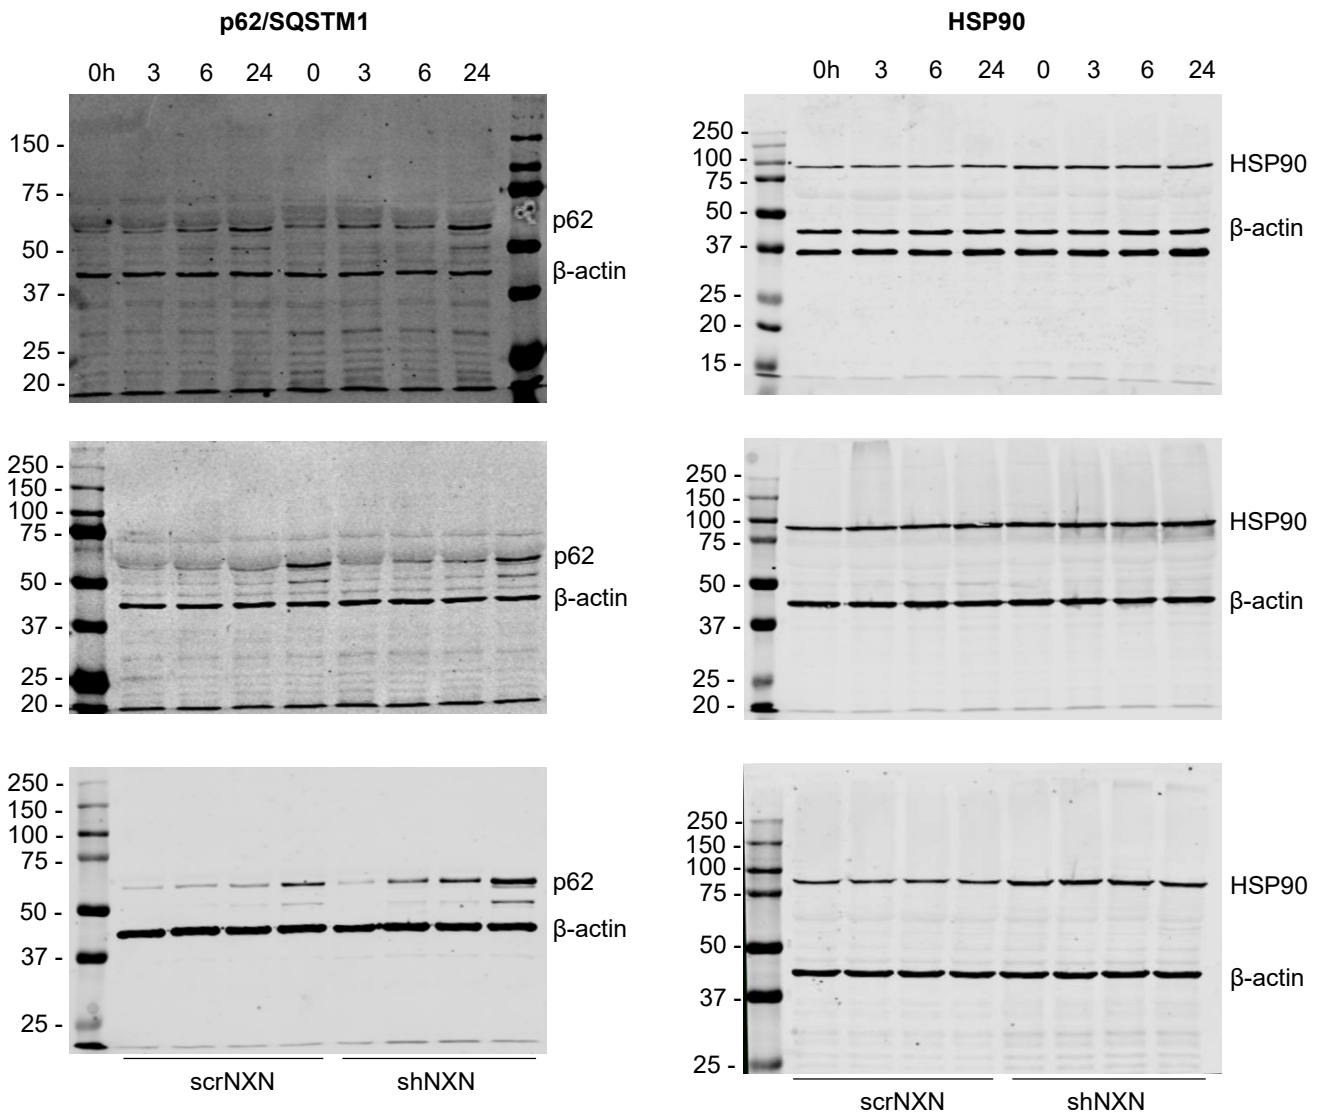

Suppl. Fig. 3: Uncut raw Western Blots presented in Figure 4. shNXN, shRNA against NXN, stably transduced SH-SY5Y neuroblastoma cells; scrNXN, scrambled shRNA transduced control SH-SY5Y cells. Blots were sequentially developed and analyzed using infrared technology

Suppl. Fig. 4 Rapamycin 1  $\mu$ M (blots of Fig. 5)

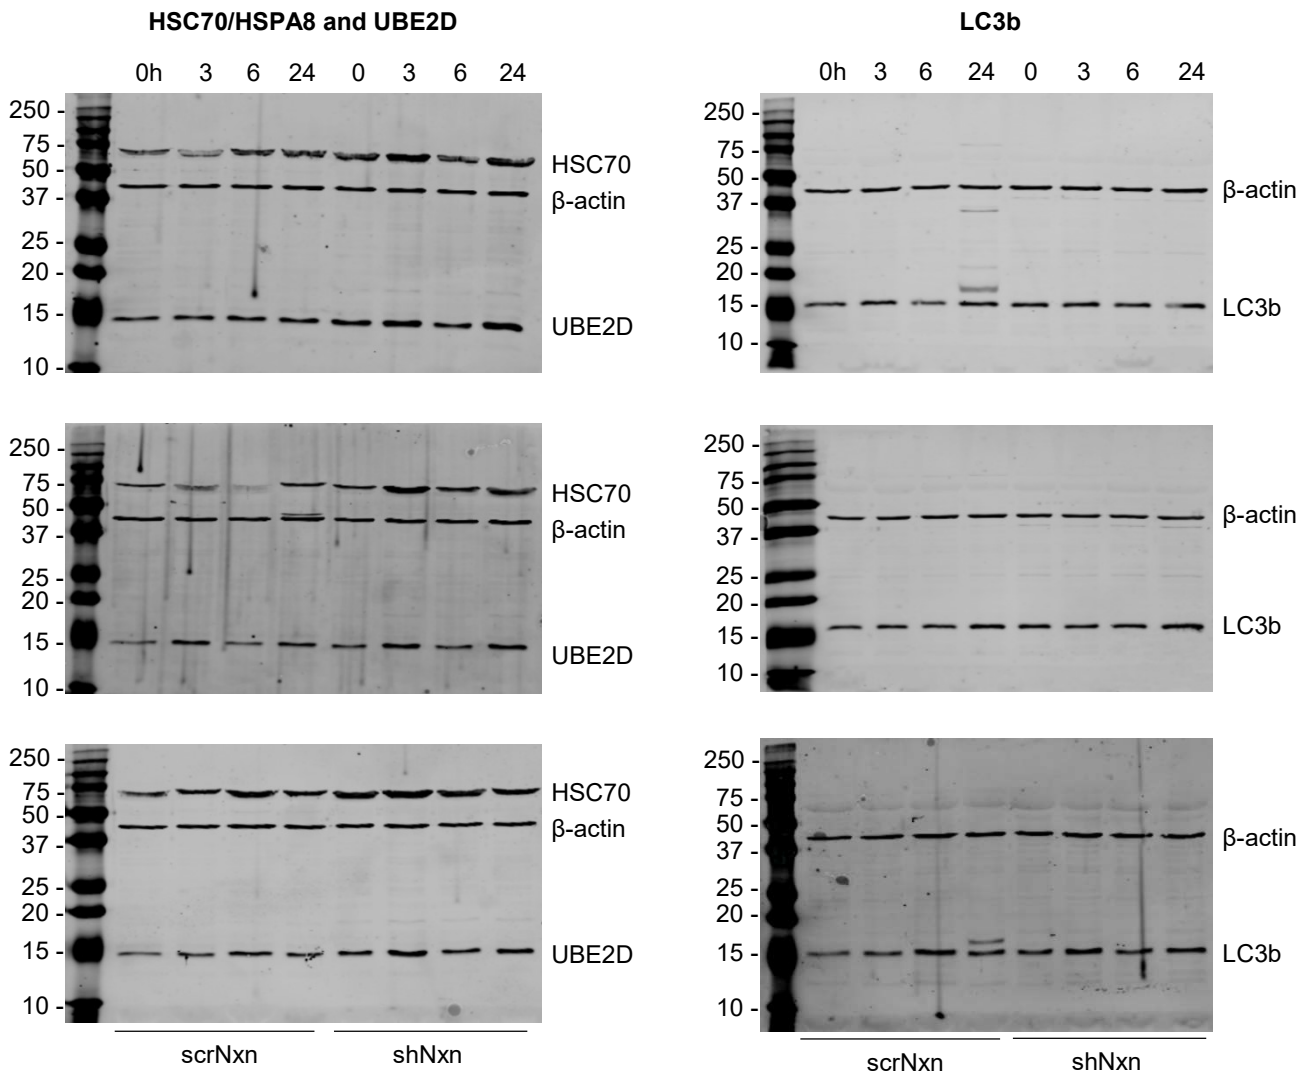

Suppl. Fig. 4: Uncut raw Western Blots presented in Figure 5. shNXN, shRNA against NXN, stably transduced SH-SY5Y neuroblastoma cells; scrNXN, scrambled shRNA transduced control SH-SY5Y cells. Blots were sequentially developed and analyzed using infrared technology

Suppl. Fig. 5 Rapamycin 0.1  $\mu$ M (blots of Fig. 6)

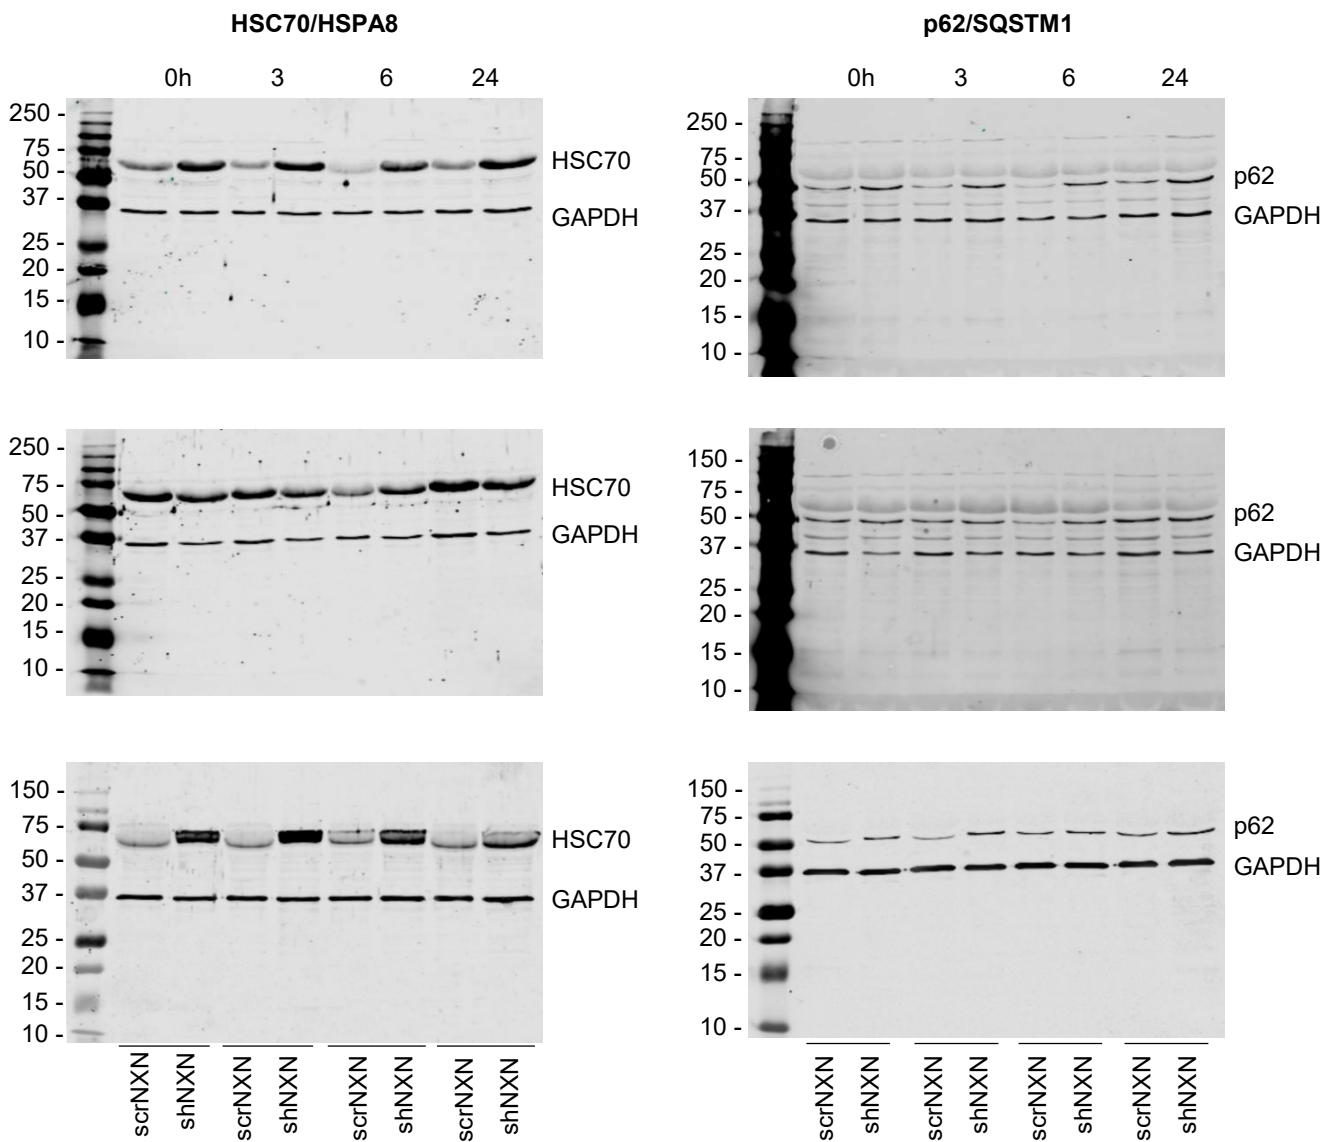

Suppl. Fig. 5: Uncut raw Western Blots presented in Figure 6. shNXN, shRNA against NXN, stably transduced SH-SY5Y neuroblastoma cells; scrNXN, scrambled shRNA transduced control SH-SY5Y cells. Blots were sequentially developed and analyzed using infrared technology

# Suppl. Fig. 6 Rapamycin 0.1 $\mu$ M (blots of Fig. 6)

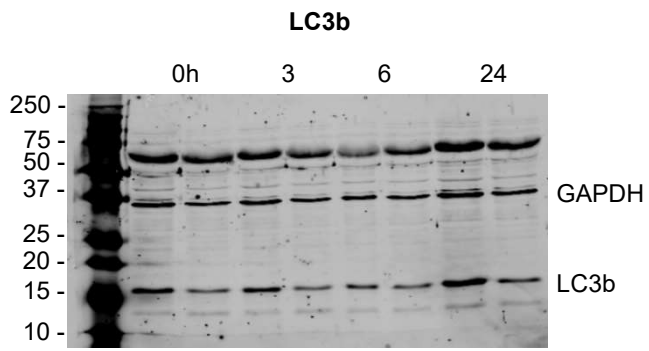

Suppl. Fig. 6: Uncut raw Western Blots presented in Figure 6. shNXN, shRNA against NXN, stably transduced SH-SY5Y neuroblastoma cells; scrNXN, scrambled shRNA transduced control SH-SY5Y cells. Blots were sequentially developed and analyzed using infrared technology

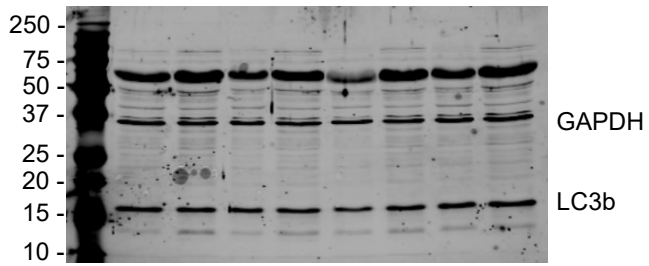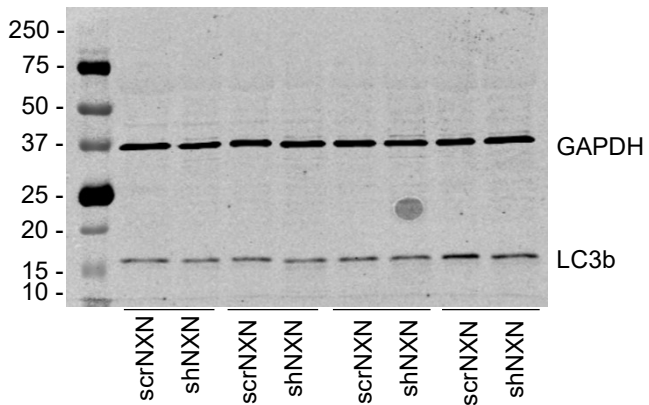

Supplement: s1 [file s1]
